# Supplementary material
Source: PubMed Central journal article supplement (PMC3140210)
Supplement: NIHMS286219-supplement.pdf [file NIHMS286219-supplement.pdf]

## APPENDIX

### CPT/HCPCS Treatment Codes

Chemotherapy, both cancers: 96400 - 96549, C8953-C8955, G0355, G0359, G0361, J9000, J9001, J9010, J9070, J9080, J9090 - J9097, J9190, J9250, J9260, J9999, Q0083, Q0085.

#### **Breast Cancer:**

Lumpectomy: 19120, 19125, 19126, 19160, 19162

Mastectomy: 19180 – 19240

Radiotherapy: 77300 – 77799

#### **Colorectal Cancer:**

Colorectal cancer excision: 44110, 44392 - 44394, 45160 - 45180, 45308, 45309, 45315, 45320, 45333, 45338, 45339, 45383 - 45385

Colorectal cancer resection: 44140 - 44160, 45110 - 45121

Colorectal cancer bypass: 44300, 44310, 44320

### ICD-9-CM Diagnosis Codes

Chemotherapy, both cancers: V58.1, V66.2, V67.2

Radiotherapy, both cancers: V58.0, V66.1, V67.1

### ICD-9-CM procedure Codes

Chemotherapy, both cancers: 99.25

Radiotherapy, both cancers: 92.21 – 92.29, 92.32, 92.33, 92.41

#### **Breast Cancer:**

Lumpectomy: 85.20 – 85.25

Mastectomy: 85.41 – 85.48

#### **Colorectal Cancer:**

Colorectal cancer excision: 45.41 – 45.49, 48.31 – 48.35

Colorectal cancer resection: 45.8, 48.5, 45.71 – 45.76, 45.79, 48.41, 48.49, 48.61 – 48.69

Colorectal cancer bypass: 46.0, 46.10 – 46.2
